# Supplementary material
Source: PubMed Central journal article supplement (PMC3436294)
Supplement: supp_M112.378091_jbc.M112.378091-1.pdf [file supp_M112.378091_jbc.M112.378091-1.pdf]

Suppl. Table 1. Cytostatic activity of 3F-3DUrd, 3DUrd and other antimetabolic drugs in tumor cell cultures

| Compound    | IC <sub>50</sub> <sup>a</sup> (μM) |             |             |             |               |                     |                 |             |
|-------------|------------------------------------|-------------|-------------|-------------|---------------|---------------------|-----------------|-------------|
|             | L1210                              | FM3A        | CEM         | MCF-7       | PC-3          | OST TK <sup>-</sup> | HeLa            | HEL         |
| 3F-3DUrd    | 16 ± 1.4                           | 89 ± 52     | 19 ± 8.6    | 123 ± 45    | 120 ± 7.1     | 53 ± 28             | 32 ± 5.0        | 47 ± 18     |
| 3DUrd       | 2.0 ± 0.6                          | 18 ± 4.2    | 7.4 ± 3.1   | 4.7 ± 0.7   | 20 ± 2.1      | 5.5 ± 0.2           | 4.8 ± 2.2       | 15 ± 4.9    |
| Pyrazofurin | 0.07 ± 0.003                       | 0.15 ± 0.05 | 0.24 ± 0.09 | 0.12 ± 0.05 | 0.054 ± 0.004 | 0.061 ± 0.005       | ≤ 0.060 ± 0.006 | 0.04 ± 0.03 |
| 6AUrd       | 0.17 ± 0.007                       | 0.43 ± 0.16 | 0.63 ± 0.28 | 0.09 ± 0.06 | 5.7 ± 1.2     | 0.017 ± 0.005       | 0.10 ± 0.05     | 6.3 ± 2.4   |
| K-Oxonate   | 152 ± 8.5                          | >200        | ≥204 ± 43   | >200        | > 200         | 98 ± 82             | >200            | > 200       |
| A771726     | 6.3 ± 2.4                          | 12 ± 1.2    | 28 ± 13     | 22 ± 5.4    | 65 ± 11       | 23 ± 1.4            | 42 ± 20         | 63 ± 0.71   |

<sup>a</sup>50% Inhibitory concentration or compound concentration required to inhibit tumor cell proliferation by 50%.

### Legends to the Supplementary Figures

Suppl. Fig. 1. Structural formulae of known antimetabolite drugs of the pyrimidine nucleotide metabolism.

Suppl. Fig. 2. HPLC chromatograms of 3DUrd- and 3F-3DUrd-treated and untreated CEM cell cultures. Exponentially growing CEM cell cultures were exposed to 10- $\mu$ M 3DUrd, 3F-3DUrd or no drug for 24 hrs.

Suppl. Fig. 3. Proposed mechanism of increased cytostatic activity by the addition of hypoxanthine/adenine to 3F-3DUrd-exposed CEM tumor cell cultures.

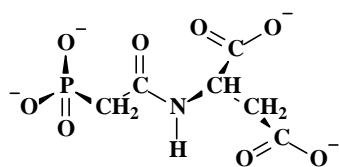**PALA**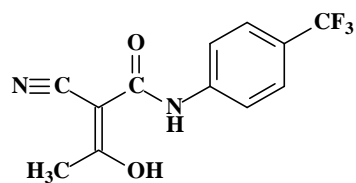**A771726**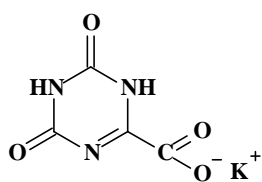**K-oxonate**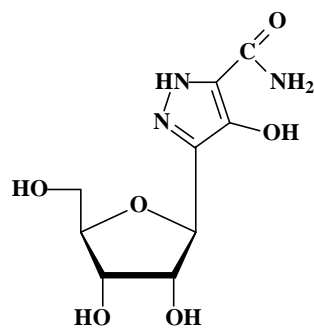**Pyrazofurin (Pyr)**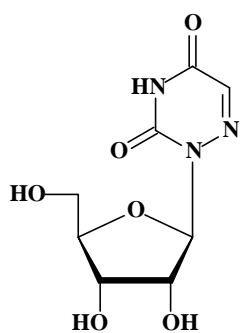**6-azaUridine (6AUrd)**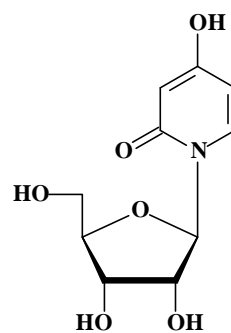**3-deazaUridine (3DUrd)**

Suppl. Fig. 1.

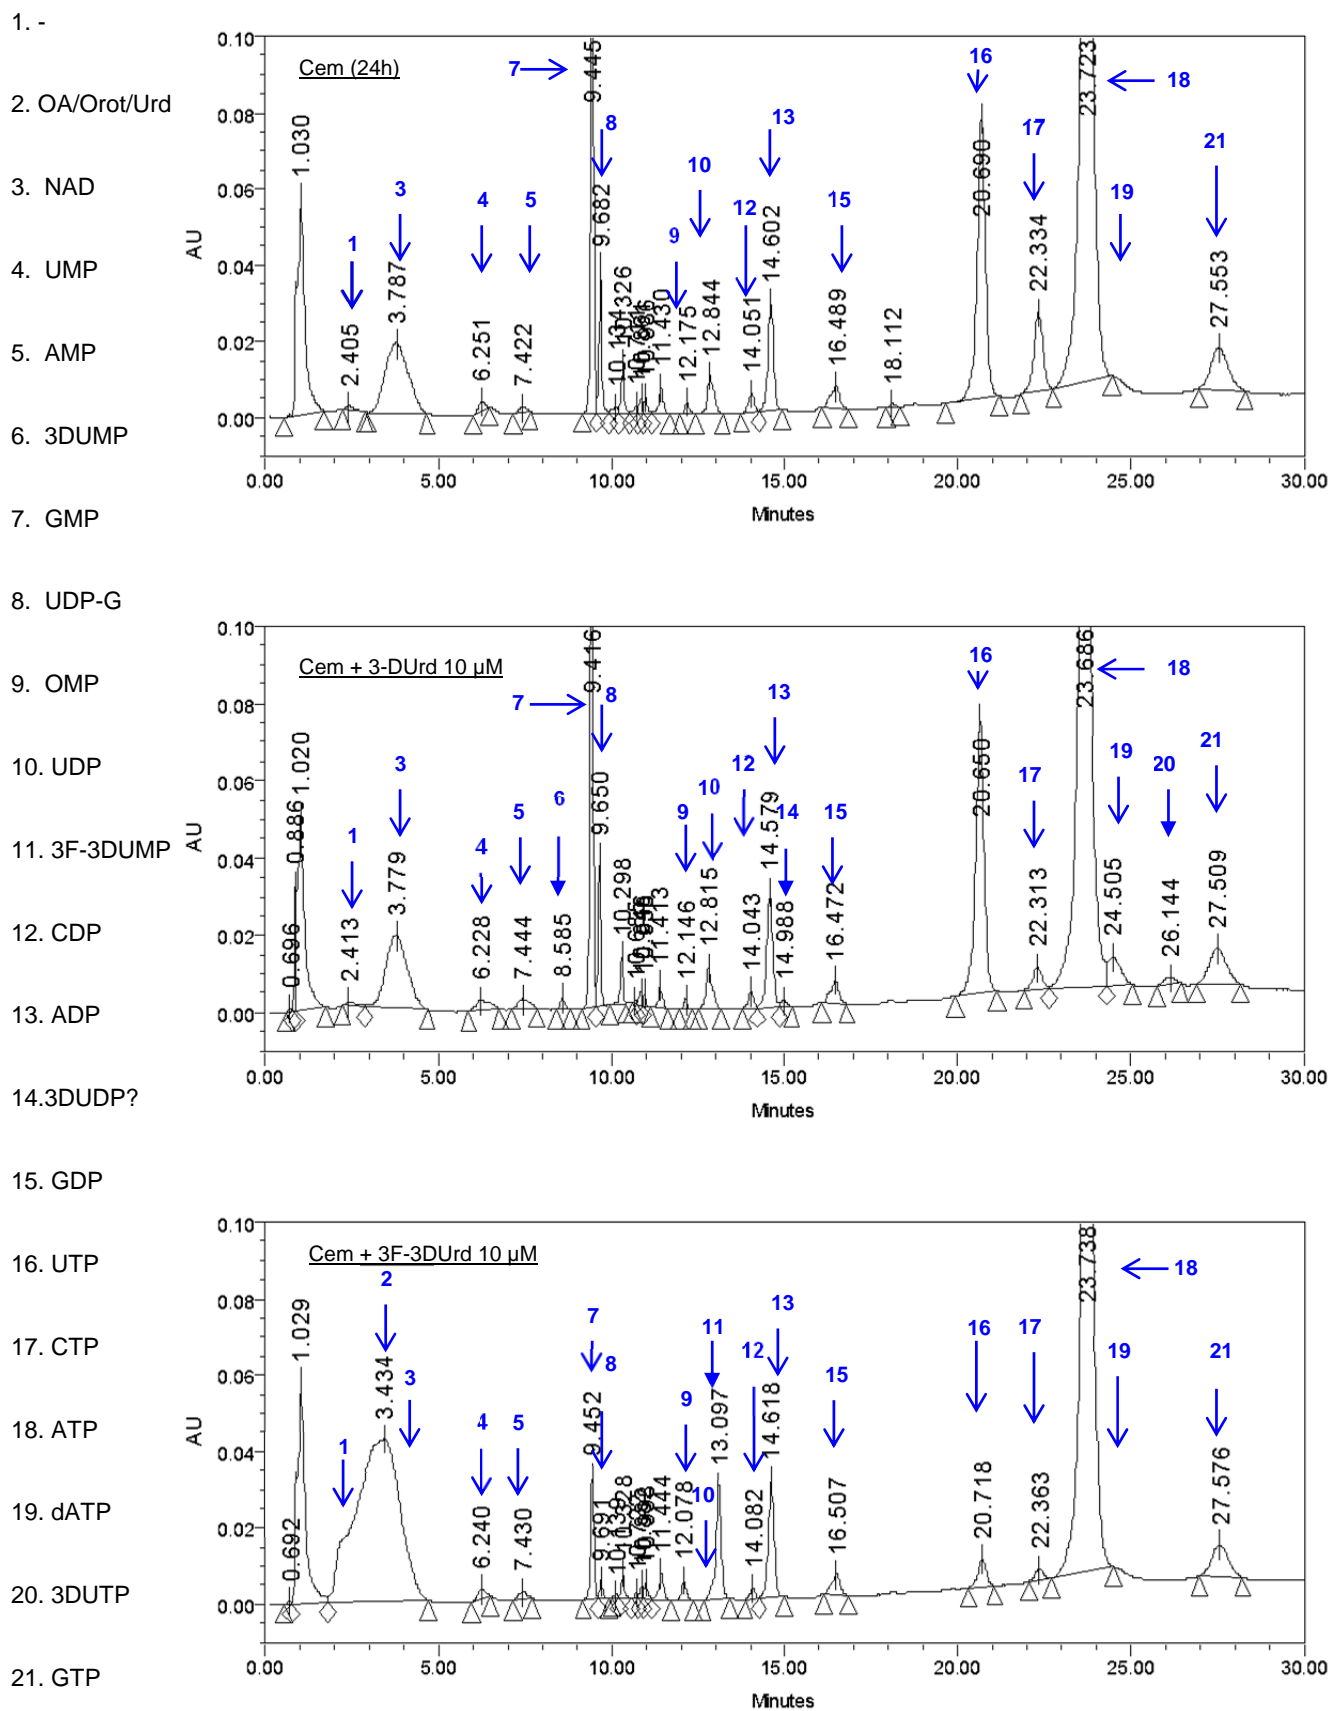

Suppl. Fig. 2

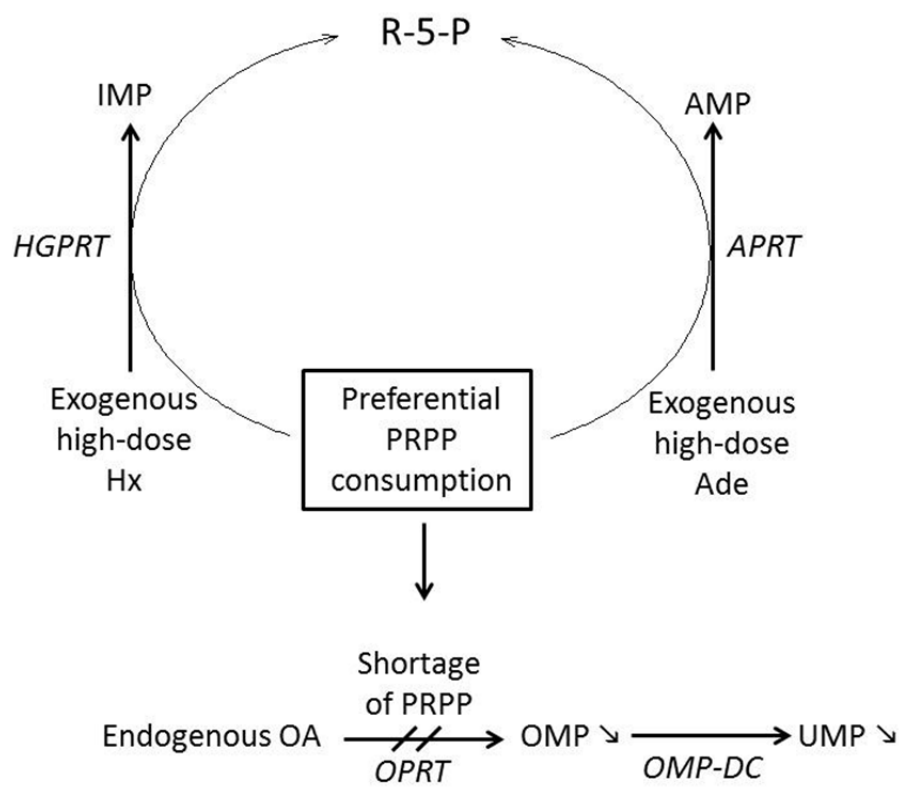

Suppl. Fig. 3
